# Supplementary material for: Reducing hospital admissions from nursing homes: a systematic review
Source: PubMed Central journal article supplement (PMC3906881; doi:10.1186/1472-6963-14-36), 2014-01-24
Supplement: 1472-6963-14-36-S1.pdf [file 1472-6963-14-36-S1.pdf]

## CONTENTS – SUPPLEMENTAL FILE

|                                                                                                                                                   | Page |
|---------------------------------------------------------------------------------------------------------------------------------------------------|------|
| Table S1: Search strategy (Cochrane Library, Medline, Embase, Pubmed, Cinahl Ebsco, ISI Web of Science, ongoing studies)                          | 2    |
| Table S2: Table of excluded studies with reason for exclusion                                                                                     | 8    |
| Table S3: Risk of bias assessments of primary studies                                                                                             | 12   |
| <i>GRADE summary of findings tables for interventions to structure and standardize care</i>                                                       | 18   |
| Table S4: GRADE Summary of findings table – Advance care directives                                                                               | 19   |
| Table S5: GRADE Summary of findings table – Palliative care                                                                                       | 21   |
| Table S6: GRADE Summary of findings table – Multifaceted implementation of a national guideline for management of nursing home-acquired pneumonia | 22   |
| Table S7: GRADE Summary of findings table – On-site treatment of pneumonia according to care pathway                                              | 23   |
| Table S8: GRADE Summary of findings table – Care protocol for hospitalized residents with COPD                                                    | 24   |
| <i>GRADE summary of findings tables for geriatric specialist services interventions</i>                                                           | 25   |
| Table S9: GRADE Summary of findings table - Geriatric specialist team compared to usual care                                                      | 25   |
| Table S10: GRADE Summary of findings table – Ambulant geriatric services compared to usual care                                                   | 26   |
| <i>GRADE summary of findings tables for influenza vaccination</i>                                                                                 | 27   |
| Table S11: GRADED Summary of findings table – Influenza vaccination of nursing home residents                                                     | 28   |
| Table S12: GRADE Summary of findings table – Influenza vaccination of health personnel                                                            | 29   |

**Table S1: Search strategy**

| - Cochrane Library – 15.6.2012 |                                                                                                  | Updated search: April 2013 |
|--------------------------------|--------------------------------------------------------------------------------------------------|----------------------------|
| ID                             | Search                                                                                           | Hits                       |
| #1                             | MeSH descriptor Nursing Homes explode all trees                                                  | 848                        |
| #2                             | MeSH descriptor Homes for the Aged, this term only                                               | 403                        |
| #3                             | (nursing NEXT (home* or facilit*)):ti,ab,kw                                                      | 1741                       |
| #4                             | ("home? for the aged" OR "home? for the elderly"):ti,ab,kw                                       | 19                         |
| #5                             | ((intermediate or long-term or longterm) NEXT care facilit*):ti,ab,kw                            | 267                        |
| #6                             | (#1 OR #2 OR #3 OR #4 OR #5)                                                                     | 1958                       |
| #7                             | MeSH descriptor Hospitalization explode all trees                                                | 10175                      |
| #8                             | (hospital NEAR/3 (treat* or stay or days or care)):ti,ab,kw                                      | 10344                      |
| #9                             | (stay NEAR/2 length):ti,ab,kw                                                                    | 7120                       |
| #10                            | (hospitaliz* or hospitalis* or rehospitalis* or rehospitaliz*):ti,ab,kw                          | 14159                      |
| #11                            | ((hospital? or patient?) NEAR/3 (admit* or admis* or readmit* or readmis* or transfer)):ti,ab,kw | 3743                       |
| #12                            | MeSH descriptor Emergency Service, Hospital explode all trees                                    | 1418                       |
| #13                            | MeSH descriptor Emergency Medical Services, this term only                                       | 738                        |
| #14                            | ((acute or immediate or emergency or critical) NEXT (care or service)):ti,ab,kw                  | 3050                       |
| #15                            | "use of emergency department?":ti,ab,kw                                                          | 8                          |
| #16                            | "emergency department? use":ti,ab,kw                                                             | 25                         |
| #17                            | (trauma center*):ti,ab,kw or (trauma centr*):ti,ab,kw                                            | 780                        |
| #18                            | (#7 OR #8 OR #9 OR #10 OR #11 OR #12 OR #13 OR #14 OR #15 OR #16 OR #17)                         | 31760                      |
| #19                            | (#6 AND #18)                                                                                     | 399                        |

- MEDLINE Ovid – 9.10.2012 Updated search: April 2013

Database(s): Ovid MEDLINE(R) In-Process & Other Non-Indexed Citations, Ovid MEDLINE(R) Daily and Ovid MEDLINE(R) 1946 to Present

| # | Searches                                                                                                 | Results |
|---|----------------------------------------------------------------------------------------------------------|---------|
| 1 | nursing homes/ or intermediate care facilities/ or skilled nursing facilities/                           | 30369   |
| 2 | Homes for the Aged/                                                                                      | 10432   |
| 3 | (nursing adj (home* or facilit*)).tw.                                                                    | 21831   |
| 4 | (home? for the aged or home? for the elderly).tw.                                                        | 2064    |
| 5 | ((intermediate or long-term or longterm) adj care facilit* ).tw.                                         | 3602    |
| 6 | or/1-5                                                                                                   | 43698   |
| 7 | hospitalization/ or "length of stay"/ or patient admission/ or patient readmission/ or patient transfer/ | 132876  |
| 8 | (hospital adj3 (treat* or stay or days or care)).tw.                                                     | 86679   |

|    |                                                                                                                                                                   |         |
|----|-------------------------------------------------------------------------------------------------------------------------------------------------------------------|---------|
| 9  | (stay adj2 length).tw.                                                                                                                                            | 23455   |
| 10 | (hospitaliz* or hospitalis* or rehospitalis* or rehospitaliz*).tw.                                                                                                | 135076  |
| 11 | ((hospital? or patient?) adj3 (admit* or admis* or readmit* or readmis* or transfer)).tw.                                                                         | 107590  |
| 12 | emergency service, hospital/ or trauma centers/                                                                                                                   | 43670   |
| 13 | Emergency Medical Services/                                                                                                                                       | 29850   |
| 14 | ((acute or immediate or emergency or critical) adj (care or service)).tw.                                                                                         | 32957   |
| 15 | ("use of emergency department?" or "emergency department? use" or trauma cent?r*).tw.                                                                             | 8557    |
| 16 | or/7-15                                                                                                                                                           | 439737  |
| 17 | 6 and 16                                                                                                                                                          | 6913    |
| 18 | (news or comment or editorial).pt.                                                                                                                                | 882738  |
| 19 | cochrane database of systematic reviews.jn.                                                                                                                       | 9141    |
| 20 | comment on.cm.                                                                                                                                                    | 520922  |
| 21 | or/18-20                                                                                                                                                          | 891825  |
| 22 | 17 not 21                                                                                                                                                         | 6741    |
| 23 | (randomized controlled trial or controlled clinical trial).pt.                                                                                                    | 420053  |
| 24 | (randomi?ed or randomly or trial or groups).tw.                                                                                                                   | 1677302 |
| 25 | or/23-24                                                                                                                                                          | 1799994 |
| 26 | Comparative Study/                                                                                                                                                | 1610942 |
| 27 | ("before and after" or comparison or compared or controlled or control group? or experimental or quasi* or (time adj (point? or series)) or repeated measur*).tw. | 3566091 |
| 28 | or/26-27                                                                                                                                                          | 4462092 |
| 29 | limit 22 to "reviews (best balance of sensitivity and specificity)"                                                                                               | 573     |
| 30 | 25 or 28 or 29                                                                                                                                                    | 5246651 |
| 31 | 22 and 30                                                                                                                                                         | 2974    |

---

## Embase Ovid – 8.10.2012 Updated search: April 2013

Database(s): Embase 1974 to 2012 June 13

---

| #  | Searches                                                        | Results |
|----|-----------------------------------------------------------------|---------|
| 1  | nursing home/                                                   | 38607   |
| 2  | nursing home patient/                                           | 2007    |
| 3  | home for the aged/                                              | 10429   |
| 4  | (nursing adj (home* or facilit*)).tw.                           | 26626   |
| 5  | (home? for the aged or home? for the elderly).tw.               | 2685    |
| 6  | ((intermediate or long-term or longterm) adj care facilit*).tw. | 4381    |
| 7  | or/1-6                                                          | 54123   |
| 8  | hospitalization/                                                | 180165  |
| 9  | "length of stay"/                                               | 67273   |
| 10 | hospital admission/                                             | 93230   |
| 11 | hospital readmission/                                           | 11014   |
| 12 | patient transport/                                              | 17535   |

|    |                                                                                                                                                                   |         |
|----|-------------------------------------------------------------------------------------------------------------------------------------------------------------------|---------|
| 13 | (hospital adj3 (treat* or stay or days or care)).tw.                                                                                                              | 117295  |
| 14 | (stay adj2 length).tw.                                                                                                                                            | 33619   |
| 15 | (hospitaliz* or hospitalis* or rehospitalis* or rehospitaliz*).tw.                                                                                                | 186955  |
| 16 | ((hospital? or patient?) adj3 (admit* or admis* or readmit* or readmis* or transfer)).tw.                                                                         | 150174  |
| 17 | emergency health service/                                                                                                                                         | 60467   |
| 18 | ((acute or immediate or emergency or critical) adj (care or service)).tw.                                                                                         | 45061   |
| 19 | ("use of emergency department?" or "emergency department? use" or trauma cent?r*).tw.                                                                             | 10060   |
| 20 | or/8-19                                                                                                                                                           | 650330  |
| 21 | 7 and 20                                                                                                                                                          | 9138    |
| 22 | (systematic review or literature review).ti.                                                                                                                      | 44522   |
| 23 | "cochrane database of systematic reviews".jn.                                                                                                                     | 3773    |
| 24 | or/22-23                                                                                                                                                          | 48290   |
| 25 | 21 not 24                                                                                                                                                         | 9082    |
| 26 | Randomized Controlled Trial/                                                                                                                                      | 332844  |
| 27 | Controlled Clinical Trial/                                                                                                                                        | 392529  |
| 28 | Multicenter Study/                                                                                                                                                | 102047  |
| 29 | (randomis* or randomiz* or randomly or random allocat*).tw. or groups.ab.                                                                                         | 1898563 |
| 30 | (trial or multicentre or multicenter or multi centre or multi center).ti.                                                                                         | 167265  |
| 31 | or/26-30                                                                                                                                                          | 2168574 |
| 32 | limit 25 to "reviews (best balance of sensitivity and specificity)"                                                                                               | 872     |
| 33 | comparative study/                                                                                                                                                | 685675  |
| 34 | ("before and after" or comparison or compared or controlled or control group? or experimental or quasi* or (time adj (point? or series)) or repeated measur*).tw. | 4338163 |
| 35 | or/33-34                                                                                                                                                          | 4722461 |
| 36 | 31 or 32 or 35                                                                                                                                                    | 5746049 |
| 37 | 25 and 36                                                                                                                                                         | 3628    |
| 38 | limit 37 to embase                                                                                                                                                | 2658    |

PubMed – 20.6.2012

Updated search: April 2013

| Search | Query                                                                                                                                                                            | Items found |
|--------|----------------------------------------------------------------------------------------------------------------------------------------------------------------------------------|-------------|
| #34    | Search (#32) AND #33                                                                                                                                                             | 32          |
| #33    | Search publisher[sb]                                                                                                                                                             | 409897      |
| #32    | Search (#30) AND #31                                                                                                                                                             | 4437        |
| #31    | Search randomised OR randomized OR "random allocation" OR "randomly allocated" OR trial OR multicenter OR "multi-center" OR multicentre OR "multi-centre" OR "systematic review" | 1103708     |
| #30    | Search (#9) AND #29                                                                                                                                                              | 27322       |
| #29    | Search ((((((#10) OR #15) OR #16) OR #17) OR #19) OR #22) OR #23) OR #24) OR #28                                                                                                 | 1456446     |
| #28    | Search "emergency departments" OR "emergency department"                                                                                                                         | 42290       |
| #24    | Search "acute care" OR "immediate care" OR "emergency care" OR "critical care" OR "acute service" OR "immediate service" OR "emergency service" OR "critical service"            | 116593      |
| #23    | Search "trauma center" OR "trauma centers" OR "trauma centre" OR "trauma centres"                                                                                                | 12137       |
| #22    | Search "emergency medical services" OR "emergency medical service"                                                                                                               | 32109       |
| #19    | Search "hospital emergency service" OR "hospital emergency services"                                                                                                             | 37047       |
| #17    | Search (hospital OR hospitals OR patient OR patients) AND (admit* or admis* or readmit* or readmis* or transfer)                                                                 | 260164      |
| #16    | Search hospitaliz* OR hospitalis* OR rehospitalis* OR rehospitaliz*                                                                                                              | 175146      |
| #15    | Search "stay length" OR "length of stay" OR "stay lengths" OR "lengths of stay"                                                                                                  | 61854       |
| #10    | Search (hospital AND (treat* OR stay OR days OR care))                                                                                                                           | 1121755     |
| #9     | Search (((#2) OR #3) OR #6) OR #7) OR #8                                                                                                                                         | 92930       |
| #8     | Search "long-term care facility" OR "long-term care facilities"                                                                                                                  | 3340        |

|    |                                                                                                         |       |
|----|---------------------------------------------------------------------------------------------------------|-------|
| #7 | Search "longterm care facility" OR "longterm care facilities"                                           | 13    |
| #6 | Search "intermediate care facility" OR "intermediate care facilities"                                   | 712   |
| #3 | Search "home for the aged" OR "homes for the aged" OR "home for the elderly" OR "homes for the elderly" | 75905 |
| #2 | Search "nursing home" OR "nursing homes" OR "nursing facility" OR "nursing facilities"                  | 37371 |

Cinahl Ebsco – 1.10.2012

Updated search: April 2013

| #   | Query                                                                                                                                                                                                                                                                                                                                                                                                                                                                                                                                                                                                          | Results |
|-----|----------------------------------------------------------------------------------------------------------------------------------------------------------------------------------------------------------------------------------------------------------------------------------------------------------------------------------------------------------------------------------------------------------------------------------------------------------------------------------------------------------------------------------------------------------------------------------------------------------------|---------|
| S42 | S23 and S41                                                                                                                                                                                                                                                                                                                                                                                                                                                                                                                                                                                                    | 599     |
| S41 | S24 or S25 or S26 or S27 or S28 or S29 or S30 or S31 or S32 or S33 or S34 or S35 or S36 or S37 or S38 or S39 or S40                                                                                                                                                                                                                                                                                                                                                                                                                                                                                            | 952243  |
| S40 | AB systematic review                                                                                                                                                                                                                                                                                                                                                                                                                                                                                                                                                                                           | 6266    |
| S39 | TI systematic review                                                                                                                                                                                                                                                                                                                                                                                                                                                                                                                                                                                           | 8650    |
| S38 | PT systematic review                                                                                                                                                                                                                                                                                                                                                                                                                                                                                                                                                                                           | 25772   |
| S37 | MH systematic review                                                                                                                                                                                                                                                                                                                                                                                                                                                                                                                                                                                           | 11487   |
| S36 | TI ( (intervention* or controlled or "control group*" or compare or compared or comparison or before N5 after or pre N5 post or pretest or "pre test" or posttest or "post test" or quasi* or experimental or evaluat* or effect or impact or "time series" or "time point*" or "repeated measur*") ) OR AB ( (intervention* or controlled or "control group*" or compare or compared or comparison or before N5 after or pre N5 post or pretest or "pre test" or posttest or "post test" or quasi* or experimental or evaluat* or effect or impact or "time series" or "time point*" or "repeated measur*") ) | 552294  |
| S35 | TI ( randomis* or randomiz* or random* W0 allocat* ) OR AB ( randomis* or randomiz* or random* W0 allocat* )                                                                                                                                                                                                                                                                                                                                                                                                                                                                                                   | 65813   |
| S34 | (MH "Health Services Research")                                                                                                                                                                                                                                                                                                                                                                                                                                                                                                                                                                                | 5917    |
| S33 | (MH "Multicenter Studies")                                                                                                                                                                                                                                                                                                                                                                                                                                                                                                                                                                                     | 6126    |
| S32 | (MH "Quasi-Experimental Studies+")                                                                                                                                                                                                                                                                                                                                                                                                                                                                                                                                                                             | 6255    |
| S31 | (MH "Pretest-Posttest Design+")                                                                                                                                                                                                                                                                                                                                                                                                                                                                                                                                                                                | 19439   |
| S30 | (MH "Experimental Studies")                                                                                                                                                                                                                                                                                                                                                                                                                                                                                                                                                                                    | 11821   |
| S29 | (MH "Nonrandomized Trials")                                                                                                                                                                                                                                                                                                                                                                                                                                                                                                                                                                                    | 127     |
| S28 | (MH "Intervention Trials")                                                                                                                                                                                                                                                                                                                                                                                                                                                                                                                                                                                     | 4367    |
| S27 | (MH "Clinical Trials")                                                                                                                                                                                                                                                                                                                                                                                                                                                                                                                                                                                         | 75603   |
| S26 | (MH "Randomized Controlled Trials")                                                                                                                                                                                                                                                                                                                                                                                                                                                                                                                                                                            | 11399   |
| S25 | PT research                                                                                                                                                                                                                                                                                                                                                                                                                                                                                                                                                                                                    | 754684  |
| S24 | PT clinical trial                                                                                                                                                                                                                                                                                                                                                                                                                                                                                                                                                                                              | 51541   |
| S23 | S7 and S22                                                                                                                                                                                                                                                                                                                                                                                                                                                                                                                                                                                                     | 4051    |
| S22 | S8 or S9 or S10 or S11 or S12 or S13 or S14 or S15 or S16 or S17 or S18 or S19 or S20 or S21                                                                                                                                                                                                                                                                                                                                                                                                                                                                                                                   | 149937  |
| S21 | trauma cent#r*                                                                                                                                                                                                                                                                                                                                                                                                                                                                                                                                                                                                 | 4152    |
| S20 | "emergency department? use"                                                                                                                                                                                                                                                                                                                                                                                                                                                                                                                                                                                    | 7       |
| S19 | "use of emergency department*"                                                                                                                                                                                                                                                                                                                                                                                                                                                                                                                                                                                 | 119     |
| S18 | ((acute or immediate or emergency or critical) N1 (care or service))                                                                                                                                                                                                                                                                                                                                                                                                                                                                                                                                           | 73717   |
| S17 | MH Emergency Medical Services                                                                                                                                                                                                                                                                                                                                                                                                                                                                                                                                                                                  | 13656   |
| S16 | MH trauma centers                                                                                                                                                                                                                                                                                                                                                                                                                                                                                                                                                                                              | 2285    |
| S15 | MH emergency service                                                                                                                                                                                                                                                                                                                                                                                                                                                                                                                                                                                           | 21466   |
| S14 | ((hospital* or patient*) N3 (admit* or admis* or readmit* or readmis* or transfer))                                                                                                                                                                                                                                                                                                                                                                                                                                                                                                                            | 23804   |
| S13 | (hospitaliz* or hospitalis* or rehospitalis* or rehospitaliz*)                                                                                                                                                                                                                                                                                                                                                                                                                                                                                                                                                 | 34321   |
| S12 | (stay N2 length)                                                                                                                                                                                                                                                                                                                                                                                                                                                                                                                                                                                               | 17351   |
| S11 | (hospital N3 (treat* or stay or days or care))                                                                                                                                                                                                                                                                                                                                                                                                                                                                                                                                                                 | 18866   |
| S10 | MH patient admission                                                                                                                                                                                                                                                                                                                                                                                                                                                                                                                                                                                           | 6385    |

|    |                                                              |       |
|----|--------------------------------------------------------------|-------|
| S9 | MH "length of stay"                                          | 13659 |
| S8 | MH hospitalization                                           | 10519 |
| S7 | S1 or S2 or S3 or S4 or S5 or S6                             | 35815 |
| S6 | ((intermediate or long-term or longterm) N1 "care facilit*") | 2343  |
| S5 | (home* for the aged or home* for the elderly)                | 1451  |
| S4 | (nursing N1 (home* or facilit*))                             | 34151 |
| S3 | MH Nursing Home Patients                                     | 7801  |
| S2 | MH skilled nursing facilities                                | 1772  |
| S1 | MH nursing homes                                             | 13657 |

---

- ISI Web of Science – 8.10.2012 Updated search: April 2013

---

| Set  | Results   |                                                                                                                                                                  |
|------|-----------|------------------------------------------------------------------------------------------------------------------------------------------------------------------|
| # 21 | 1,410     | #20 AND #16                                                                                                                                                      |
| # 20 | 2,882,383 | #19 OR #18 OR #17                                                                                                                                                |
| # 19 | 1,961,058 | Topic=("comparative stud*") OR Topic=("before and after" or "control group?" or experimental or quasi* or (time NEAR (point? or series)) or "repeated measur*")) |
| # 18 | 38,378    | Topic=("systematic review*")                                                                                                                                     |
| # 17 | 993,848   | Topic=(randomised or randomized or "random allocation" or "randomly allocated" or trial or multicenter or "multi center" or multicentre or "multi centre")       |
| # 16 | 6,014     | #15 AND #4                                                                                                                                                       |
| # 15 | 274,061   | #14 OR #13 OR #12 OR #11 OR #10 OR #9 OR #8 OR #7 OR #6 OR #5                                                                                                    |
| # 14 | 375       | Topic=("emergency department\$ use")                                                                                                                             |
| # 13 | 44        | Topic=("use of emergency department\$")                                                                                                                          |
| # 12 | 73,667    | Topic=(((acute or immediate or emergency or critical) NEAR (care or service)))                                                                                   |
| # 11 | 6,959     | Topic=(((("trauma center*" or "trauma centr*"))                                                                                                                  |
| # 10 | 3,247     | Topic=("Emergency Medical Services")                                                                                                                             |
| # 9  | 88        | Topic=("hospital emergency service")                                                                                                                             |
| # 8  | 45,724    | Topic=((((hospital? or patient?) NEAR/3 (admit* or admis* or readmit* or readmis* or transfer))))                                                                |
| # 7  | 103,662   | Topic=(((hospitaliz* or hospitalis* or rehospitalis* or rehospitaliz*)))                                                                                         |
| # 6  | 28,342    | Topic=(((stay NEAR/2 length)))                                                                                                                                   |
| # 5  | 84,360    | Topic=(((hospital NEAR/3 (treat* or stay or days or care))))                                                                                                     |
| # 4  | 31,170    | #3 OR #2 OR #1                                                                                                                                                   |
| # 3  | 2,767     | Topic=(((intermediate* or long-term or longterm) NEAR "care facilit*"))                                                                                          |
| # 2  | 148       | Topic=("home\$ for the aged" or "home\$ for the elderly")                                                                                                        |
| # 1  | 29,494    | Topic=((nursing NEAR (home* or facilit*)))                                                                                                                       |

**Search for ongoing studies:**

**Search date:** 11 April 2013

Prospero: <http://www.crd.york.ac.uk/prospero/>

*nursing homes*

17 hits, 1 possibly relevant

<http://apps.who.int/trialsearch/default.aspx>

*nursing homes AND hospital\**

37 hits, none relevant

<http://clinicaltrials.gov>

*nursing homes*

403 hits, 5 possibly relevant

Table S2: Excluded studies with reason for exclusion

| Study references                                                                                                                                                                                                                                                          | Cause for exclusion of study                                                     |
|---------------------------------------------------------------------------------------------------------------------------------------------------------------------------------------------------------------------------------------------------------------------------|----------------------------------------------------------------------------------|
| Abraham JL. Advances in palliative medicine and end-of-life care. <i>Annu Rev Med</i> 2011;62:187-99.                                                                                                                                                                     | Not an experimental study.                                                       |
| Ackermann RJ, Kemle KA. The effect of a physician assistant on the hospitalization of nursing home residents. <i>JAGS</i> 1998;46:610-614.                                                                                                                                | No control group.                                                                |
| Adema HH. Oseltamivir in the treatment and prevention of influenza in the nursing home. <i>Tijdschrift voor Verpleeghuisgeneeskunde</i> 2004;28(3):15-8.                                                                                                                  | Primary study excluded, systematic review included (Jefferson 2010).             |
| Ahearn DJ, Jackson TB, McIlmoyle J, Weatherburn AJ. Improving end of life care for nursing home residents: an analysis of hospital mortality and readmission rates. <i>Postgrad Med J</i> 2010;86:131-135.                                                                | Not an experimental study.                                                       |
| Beghe C. An advance directive programme in nursing homes reduced services use without affecting patient satisfaction. <i>EBN</i> 2000;3:125.                                                                                                                              | A review of Molloy 2000.                                                         |
| Bellantonio S, Kenny AM, Fortinsky RH, Kleppinger A, Robison J, Gruman C, et al. Efficacy of a geriatrics team intervention for residents in dementia-specific assisted living facilities: effect on unanticipated transitions. <i>J Am Geriatr Soc</i> 2008;56(3):523-8. | Population does not satisfy inclusion criterion.                                 |
| Bollig G, Husebø BS, Husebø S. Vaktjeneste for leger på sykehjem. <i>Tidsskr Nor Legeforen</i> 2008;128:2722-2724.                                                                                                                                                        | No control group.                                                                |
| Booy R, Lindley RI, Dwyer DE, Yin JK, Heron LG et al. Treating and preventing influenza in aged care facilities: a cluster randomised controlled trial. <i>PLOS ONE</i> 2012;7(10):1-16                                                                                   | Not an aim to reduce hospitalisation.                                            |
| Bowman CE, Elford J, Dovey J, Campbell S, Barrowclough H. Acute hospital admissions from nursing homes: some may be avoidable. <i>Postgrad Med J</i> 2001;77:40-42.                                                                                                       | Retrospective study design.                                                      |
| CARE program replaces pre-admission assessment... Client Assessment, Referral, and Evaluation. <i>Kans Nurse</i> 1994;69(10):11.                                                                                                                                          | Not a scientific article.                                                        |
| Crilly J, Chaboyer W, Wallis M, Thalib L, Polit D. An outcomes evaluation of an Australian Hospital in the Nursing Home admission avoidance programme. <i>J Clin Nurs</i> 2010;20(7-8):1178-87.                                                                           | Retrospective study design.                                                      |
| Deguchi Y, Takasugi Y, Tatara K. Efficacy of influenza vaccine in the elderly in welfare nursing homes: reduction in risks of mortality and morbidity during an influenza A (H3N2) epidemic. <i>J Med Microbiol</i> 2000;49(6):553-6.                                     | Excluded primary study and included systematic review in stead (Jefferson 2010). |



|                                                                                                                                                                                                                                                                                              |                                                                                      |
|----------------------------------------------------------------------------------------------------------------------------------------------------------------------------------------------------------------------------------------------------------------------------------------------|--------------------------------------------------------------------------------------|
| <p>Deguchi Y, Takasugi Y. Efficacy of influenza vaccine in the elderly: reduction in risks of mortality and morbidity during an influenza A (H3N2) epidemic for the elderly in nursing homes. <i>Int J Clin Lab Res</i> 2000;30(1):1-4.</p>                                                  | <p>Excluded primary study and included systematic review in stead.</p>               |
| <p>Dempsey CL. Nursing home-acquired pneumonia: outcomes from a clinical process improvement program (Structured abstract). <i>Pharmacotherapy</i> 1995;15:S33-S38.</p>                                                                                                                      | <p>Not an experimental study.</p>                                                    |
| <p>Hancock HC, Close H, Mason JM, Murphy JJ, Fuat A, de Belder M et al. Feasibility of evidence-based diagnosis and management of heart failure in older people in care: a pilot randomised controlled trial. <i>BMC Geriatrics</i> 2012, 12:70.</p>                                         | <p>Intervention aim not to reduce hospitalisation. Feasibility study.</p>            |
| <p>Hayward AC, Harling R, Wetten S, Johnson AM, Munro S, Smedley J, et al. Effectiveness of an influenza vaccine programme for care home staff to prevent death, morbidity, and health service use among residents: cluster randomised controlled trial. <i>BMJ</i> 2006;333(7581):1241.</p> | <p>Excluded primary study and included systematic review in stead.(Thomas 2010).</p> |
| <p>Hutt E, Ruscini JM, Corbett K, Radcliff TA, Kramer AM, Williams EM, Liebrecht D, Klenke W, Hartmann S. A multifaceted intervention to implement guidelines improved treatment of nursing home-acquired pneumonia in a State Veterans Home. <i>JAGS</i> 2006;54:1694-1700.</p>             | <p>Pilot test.</p>                                                                   |
| <p>Kane RA, Lum TY, Cutler LJ, Degenholtz HB, Yu T-C. Resident outcomes in small-house nursing homes: A longitudinal evaluation of the Initial Green House Program. <i>J Am Geriatr Soc</i> 2007;55(6):832-9.</p>                                                                            | <p>Not a program for reducing hospitalisation.</p>                                   |
| <p>Kane RL, Keckhafer G, Flood S, Bershadsky B, Siadaty MS. The effect of Evercare on hospital use. <i>J Am Geriatr Soc</i> 2003;51(10):1427-34.</p>                                                                                                                                         | <p>Retrospective study design.</p>                                                   |
| <p>Kane RL, Flood S, Bershadsky B, Keckhafer G. Effect of an innovative medicare managed care program on the quality of care for nursing home residents. <i>Gerontologist</i> 2004;44(1):95-103.</p>                                                                                         | <p>Retrospective study design.</p>                                                   |
| <p>Kane RL, Garrard J, Skay CL, Radpsevocj D; Buchanan JL, McDermott SM, Arnold SB, Kepperle L. Effects of a Geriatric Nurse Practitioner on Process and Outcome of Nursing Home Care. <i>American Journal of Public Health</i> 1989;79:1271-1277.</p>                                       | <p>Retrospective study design.</p>                                                   |
| <p>Kane RL, Garrard J, Buchanan JL, Rosenfeld A, Skay C, McDermott S. Improving primary care in nursing homes. <i>JAGS</i> 1991;39:359-367.</p>                                                                                                                                              | <p>Retrospective study design.</p>                                                   |
| <p>Konetzka RT, Spector W, Limcangco MR. Reducing hospitalizations from long-term care settings. <i>Med Care Res Rev</i> 2008;65(1):40-66.</p>                                                                                                                                               | <p>Not a systematic review.</p>                                                      |
| <p>Krüger K, Jansen K, Grimsmo A, Eide GE, Geitung JT. Hospital admissions from nursing homes: rates and reasons. <i>Nursing research and practice</i> 2011. Article ID 247623, 6 pages, doi:10.1155/2011/247623</p>                                                                         | <p>Not an experimental study</p>                                                     |

|                                                                                                                                                                                                                                                                                              |                                                                                           |
|----------------------------------------------------------------------------------------------------------------------------------------------------------------------------------------------------------------------------------------------------------------------------------------------|-------------------------------------------------------------------------------------------|
| Loeb M, Brazil K, Lohfeld L, McGeer A, Simor A, Stevenson K, et al. Effect of a multifaceted intervention on number of antimicrobial prescriptions for suspected urinary tract infections in residents of nursing homes: cluster randomised controlled trial. <i>BMJ</i> 2005;331(7518):669. | Intervention aim not to reduce hospitalisation.                                           |
| Mennick F. Treating pneumonia in nursing home residents. <i>American Journal of Nursing</i> 2006;106:22.                                                                                                                                                                                     | Review of Loeb 2006.                                                                      |
| Miller SC, Gozalo P, Mor V. Hospice enrollment and hospitalization of dying nursing home patients. <i>Am J Med</i> 2001;111:38-44.                                                                                                                                                           | Retrospective study design.                                                               |
| Mor V, Intrator O, Fries BE, Phillips C, Teno J, Hiris J, et al. Changes in hospitalization associated with introducing the Resident Assessment Instrument. <i>J Am Geriatr Soc</i> 1997;45(8):1002-10.                                                                                      | No control group.                                                                         |
| Mott PD, Barker WH. Hospital and medical care use by nursing home patients: the effect of patient care plans. <i>J Am Geriatr Soc</i> 1988;36(1):47-53.                                                                                                                                      | No control group.                                                                         |
| Naughton BJ, Mylotte JM, Ramadan F, Karuza J, Priore RL. Antibiotic use, hospital admissions, and mortality before and after implementing guidelines for nursing home-acquired pneumonia. <i>JAGS</i> 2001;49:1020-1024.                                                                     | Implementation of guidelines for antibiotic treatment of nursing-home acquired pneumonia. |
| Oliver DP, Porock D, Zweig S. End-of-life care in U.S. nursing homes: A review of the evidence. <i>J AM MED DIR ASSOC</i> 2005;6(3 SUPPL.):S20-S30.                                                                                                                                          | Review of studies in general about end-of-life care. No relevant studies.                 |
| Ouslander JG, Lamb G, Tappen R, Herndon L, Diaz S, Roos BA, et al. Interventions to reduce hospitalizations from nursing homes: evaluation of the INTERACT II collaborative quality improvement project. <i>J Am Geriatr Soc</i> 2011;59(4):745-53.                                          | The comparison group was not selected beforehand.                                         |
| Pilgram EH, Hierzer A, Bohnstingl M, Osprian I, Schippinger W. The GECO project: impact of a geriatric consultant service on acute hospital admissions of nursing home residents. 8 <sup>th</sup> Congress of the EUGMS/European Geriatric Medicine 2012; 35:S110 (P259).                    | Conference abstract.                                                                      |
| Rainfray M, Bourdel-Marchasson I, Dehail P, Richard-Harston S. Comprehensive geriatric assessment: A useful tool for prevention of acute situations in the elderly. <i>Ann Med Interne (Paris)</i> 2002;153(6):397-402.                                                                      | Only about the assessment tool.                                                           |
| Snider KT, Snider EJ, Johnson JC, Hagan C, Schoenwald C. Preventative osteopathic manipulative treatment and the elderly nursing home resident: a pilot study. <i>J Am Osteopath</i>                                                                                                         | Not an aim to reduce hospitalisation.                                                     |

---

Assoc 2012;112(8):489-501.

---

Spinewine A, Fialová D, Byrne S. The role of the pharmacist in optimizing pharmacotherapy in older people. *Drugs Aging* 2012;29(6):495-510.

---

Stevenson DG, Bramson JS. Hospice care in the nursing home setting: a review of the literature. *J Pain Symptom Manage* 2009;38(3):440-51.

---

Teno J, Lynn J, Connors AF, Wenger N, Phillips RS, Alzola C, et al. The illusion of end-of-life resource savings with advance directives. *J Am Geriatr Soc* 1997;45(4):513-8.

---

Teno J, Lynn J, Wenger N, Phillips RS, Murphy DP, Connors AF, et al. Advance directives for seriously ill hospitalized patients: Effectiveness with the Patient Self-Determination Act and the SUPPORT intervention. *J Am Geriatr Soc* 1997;45(4):500-7.

---

Teno JM, Gozalo P, Mitchell S, Bynum J, Dosa D, Mor V. Does increasing advance care planning reduce terminal hospitalizations among nursing home residents? *Palliative Medicine* 2010;24:S5-S229.

---

Teno JM, Gozalo P, Michell S, Bynum J, Dosa D, Mor V. Terminal hospitalizations of nursing home residents: does facility increasing the rate of do not resuscitate orders reduce them?

---

Werner RM, Konetzka RT, Stuart EA, Norton EC, Polsky D, Park J. Impact of public reporting on quality of postacute care. *HSR: Health Services Research* 2009;44:1169-1187.

---

Yayan J. Trends in intensive care in patients over 90 years of age. *Clinical Interventions in Aging* 2012;7:339-347.

---

Ye Y, Phipps A, Reiman S, Carr D, Parker R. Implementing INTERACT (Intervention to Reduce Avoidable Acute Care Transfer) Distance Learning Curriculum to Reduce Avoidable Acute Care Transfer and Improve the Quality of Care in a Skilled Nursing Facility. *J AM MED DIR ASSOC* 2012;13(3):B15.

---

Zafirau WJ, snyder SS, Hazelett SE, Bansal A, McMahon S. Improving transitions: efficacy of a transfer form to communicate patients' wishes. *American Journal of Medical Quality* 2012;27:291-296.

---

**Table S3. Risk of bias assessments of primary studies**

| <b>Hutt 2011<br/>Domain</b>                                                                                                   | <b>Support for judgement</b>                                                                                                                                                                                                                                                                                                                    | <b>Review authors'<br/>judgement</b> |
|-------------------------------------------------------------------------------------------------------------------------------|-------------------------------------------------------------------------------------------------------------------------------------------------------------------------------------------------------------------------------------------------------------------------------------------------------------------------------------------------|--------------------------------------|
| <i>Selection bias</i>                                                                                                         |                                                                                                                                                                                                                                                                                                                                                 |                                      |
| <b>Random sequence generation</b>                                                                                             | No random sequence generation. "... there were significant differences between intervention and control homes in baseline guideline compliance, subject characteristics and facility characteristics, including nursing resident staffing ratios and nursing staff turnover."                                                                   | No                                   |
| <b>Allocation concealment</b>                                                                                                 | "Denver-area homes received the intervention; homes in Kansas and Missouri served as controls"                                                                                                                                                                                                                                                  | No                                   |
| <i>Performance bias</i>                                                                                                       |                                                                                                                                                                                                                                                                                                                                                 |                                      |
| <b>Blinding of participants and personnel</b> <i>Assessments should be made for each main outcome (or class of outcomes).</i> | "unblinded study", but the experiment and control groups were in different geographic areas. We assess the risk of bias to be low.                                                                                                                                                                                                              | Yes                                  |
| <i>Detection bias</i>                                                                                                         |                                                                                                                                                                                                                                                                                                                                                 |                                      |
| <b>Blinding of outcome assessment</b> <i>Assessments should be made for each main outcome (or class of outcomes).</i>         | Data collected from chart review by 6 trained nurses using a "previously tested, systematic chart review instrument on laptop computers [...] with built-in range and logic checks". Every tenth chart was re-reviewed by the project manager and another data collector.                                                                       | Yes                                  |
| <i>Attrition bias</i>                                                                                                         |                                                                                                                                                                                                                                                                                                                                                 |                                      |
| <b>Incomplete outcome data</b> <i>Assessments should be made for each main outcome (or class of outcomes).</i>                | The authors state that "the appropriateness of nearly one third of the hospitalization decisions could not be evaluated because a full set of vital signs was not recorded at illness onset". Also, they report that "Only items with inter-rater reliability scores of 0.7 or better by Cohen's Kappa or percent agreement are reported here". | Unclear                              |
| <i>Reporting bias</i>                                                                                                         |                                                                                                                                                                                                                                                                                                                                                 |                                      |
| <b>Selective reporting</b>                                                                                                    | No reason to suspect.                                                                                                                                                                                                                                                                                                                           | Yes                                  |
| <b>Other sources of bias</b>                                                                                                  |                                                                                                                                                                                                                                                                                                                                                 | Unclear                              |
| <b>Overall judgment</b>                                                                                                       | High risk of bias                                                                                                                                                                                                                                                                                                                               |                                      |

|                                                                                                                               |                                                                                                                                                                                                                                |                           |
|-------------------------------------------------------------------------------------------------------------------------------|--------------------------------------------------------------------------------------------------------------------------------------------------------------------------------------------------------------------------------|---------------------------|
| <b>Díaz-Gegúndez 2011</b><br>Domain                                                                                           | Support for judgement                                                                                                                                                                                                          | Review authors' judgement |
| <i>Selection bias</i>                                                                                                         |                                                                                                                                                                                                                                |                           |
| <b>Random sequence generation</b>                                                                                             | No random sequence generation due to study design, CBA.                                                                                                                                                                        | NO                        |
| <b>Allocation concealment</b>                                                                                                 | Probably no allocation concealment due to study design, CBA. It is not reported how/why the group of 10 nursing homes was chosen for the intervention and the other 14 as control.                                             | NO                        |
| <i>Performance bias</i>                                                                                                       |                                                                                                                                                                                                                                |                           |
| <b>Blinding of participants and personnel</b> <i>Assessments should be made for each main outcome (or class of outcomes).</i> | Not possible to blind participants and personnel. Is it likely that intervention homes withhold residents from hospital because there is a strong focus on this due to the study going on? Recruiters most likely not blinded. | Unclear                   |
| <i>Detection bias</i>                                                                                                         |                                                                                                                                                                                                                                |                           |
| <b>Blinding of outcome assessment</b> <i>Assessments should be made for each main outcome (or class of outcomes).</i>         | Hospitalisation is an objective measure – not likely that unblinded outcome assessors make a difference.                                                                                                                       | Yes                       |
| <i>Attrition bias</i>                                                                                                         |                                                                                                                                                                                                                                |                           |
| <b>Incomplete outcome data</b> <i>Assessments should be made for each main outcome (or class of outcomes).</i>                | How was outcome assessment done? No loss is reported.                                                                                                                                                                          | Unclear                   |
| <i>Reporting bias</i>                                                                                                         |                                                                                                                                                                                                                                |                           |
| <b>Selective reporting</b>                                                                                                    | No reason to suspect.                                                                                                                                                                                                          |                           |
| <b>Other sources of bias</b>                                                                                                  | A small difference between baseline values for outcome measure. Group characteristics at baseline are not reported. Control of confounding not reported.                                                                       | No                        |
| <b>Overall judgment</b>                                                                                                       | High risk of bias                                                                                                                                                                                                              |                           |

| <b>Loeb 2006</b>                                                                                                                 |                                                                                                                                                                                                                                                                              |                           |
|----------------------------------------------------------------------------------------------------------------------------------|------------------------------------------------------------------------------------------------------------------------------------------------------------------------------------------------------------------------------------------------------------------------------|---------------------------|
| Domain                                                                                                                           | Support for judgement                                                                                                                                                                                                                                                        | Review authors' judgement |
| <i>Selection bias</i>                                                                                                            |                                                                                                                                                                                                                                                                              |                           |
| <b>Random sequence generation</b>                                                                                                | "Nursing homes were paired by the number of occupied beds to help ensure similar rates of pneumonia and other lower respiratory tract infections [...]. One member of each pair was randomized to [...] using a random numbers table."                                       | Yes                       |
| <b>Allocation concealment</b>                                                                                                    | "...by a statistician independent of the study team ..." (pp 2504).                                                                                                                                                                                                          | Yes                       |
| <i>Performance bias</i>                                                                                                          |                                                                                                                                                                                                                                                                              |                           |
| <b>Blinding of participants and personnel</b><br><i>Assessments should be made for each main outcome (or class of outcomes).</i> | It was not possible to blind participants or personnel. The clinical pathway that was to be implemented was standardised in a rather clear and unambiguous float chart with very specific assessments of criteria for hospitalisation or not. We assess risk of bias as low. | Yes                       |
| <i>Detection bias</i>                                                                                                            |                                                                                                                                                                                                                                                                              |                           |
| <b>Blinding of outcome assessment</b><br><i>Assessments should be made for each main outcome (or class of outcomes).</i>         | We perceive the outcomes to be assessed, hospitalization and death, as objective outcomes.                                                                                                                                                                                   | Yes                       |
| <i>Attrition bias</i>                                                                                                            |                                                                                                                                                                                                                                                                              |                           |
| <b>Incomplete outcome data</b><br><i>Assessments should be made for each main outcome (or class of outcomes).</i>                | The authors declare 97% follow-up of hospitalization (p 2506)                                                                                                                                                                                                                | Yes                       |
| <i>Reporting bias</i>                                                                                                            |                                                                                                                                                                                                                                                                              |                           |
| <b>Selective reporting</b>                                                                                                       | No reason to suspect                                                                                                                                                                                                                                                         | Yes                       |
| <b>Other sources of bias</b>                                                                                                     | This was a matched cluster trial. Clustering was accounted for, but somewhat unclear whether the matching was accounted for.                                                                                                                                                 | Unclear                   |
| <b>Overall judgment</b>                                                                                                          | Low risk of bias                                                                                                                                                                                                                                                             |                           |

| <b>Lee 2002</b>                                                                                                               |                                                                                                                                                                  |                           |
|-------------------------------------------------------------------------------------------------------------------------------|------------------------------------------------------------------------------------------------------------------------------------------------------------------|---------------------------|
| Domain                                                                                                                        | Support for judgement                                                                                                                                            | Review authors' judgement |
| <i>Selection bias</i>                                                                                                         |                                                                                                                                                                  |                           |
| <b>Random sequence generation</b>                                                                                             | How the sequence was generated is not reported                                                                                                                   | Unclear                   |
| <b>Allocation concealment</b>                                                                                                 | Cluster trial                                                                                                                                                    | Yes                       |
| <i>Performance bias</i>                                                                                                       |                                                                                                                                                                  |                           |
| <b>Blinding of participants and personnel</b> <i>Assessments should be made for each main outcome (or class of outcomes).</i> | We assess risk of bias here to be low, in spite of participants and community nurses most likely were not blinded.                                               | Yes                       |
| <i>Detection bias</i>                                                                                                         |                                                                                                                                                                  |                           |
| <b>Blinding of outcome assessment</b> <i>Assessments should be made for each main outcome (or class of outcomes).</i>         | Likely not blinded, but objective data: hospital days                                                                                                            | Yes                       |
| <i>Attrition bias</i>                                                                                                         |                                                                                                                                                                  |                           |
| <b>Incomplete outcome data</b> <i>Assessments should be made for each main outcome (or class of outcomes).</i>                | They lost ca 20% after randomization due to death, returning home or moving to another nursing home. Not possible to see how this is distributed between groups. | Unclear                   |
| <i>Reporting bias</i>                                                                                                         |                                                                                                                                                                  |                           |
| <b>Selective reporting</b>                                                                                                    | No reason to suspect                                                                                                                                             | Yes                       |
| <b>Other sources of bias</b>                                                                                                  | Cluster trial: Blinding of recruiters not reported.<br>Statistical analyses does not correct for cluster effect or for matching.                                 | No                        |
| <b>Overall judgment</b>                                                                                                       | High risk of bias                                                                                                                                                |                           |



| <b>Schippinger 2012</b>                                                                                                       |                                                                                                                                                                              |                           |
|-------------------------------------------------------------------------------------------------------------------------------|------------------------------------------------------------------------------------------------------------------------------------------------------------------------------|---------------------------|
| Domain                                                                                                                        | Support for judgement                                                                                                                                                        | Review authors' judgement |
| <i>Selection bias</i>                                                                                                         |                                                                                                                                                                              |                           |
| <b>Random sequence generation</b>                                                                                             | No random sequence generation due to study design CBA – one intervention home and one control home                                                                           | No                        |
| <b>Allocation concealment</b>                                                                                                 | Probably no concealment of allocation due to study design CBA – as above. We do not know how/why one nursing homes was chosen for the intervention and the other as control. | No                        |
| <i>Performance bias</i>                                                                                                       |                                                                                                                                                                              |                           |
| <b>Blinding of participants and personnel</b> <i>Assessments should be made for each main outcome (or class of outcomes).</i> | Not possible to blind any of the two. This could influence the decision to hospitalize. Recruiters most likely not blinded.                                                  | Unclear                   |
| <i>Detection bias</i>                                                                                                         |                                                                                                                                                                              |                           |
| <b>Blinding of outcome assessment</b> <i>Assessments should be made for each main outcome (or class of outcomes).</i>         | Most likely not blinded, but objective data: acute hospitalisations.                                                                                                         | Yes                       |
| <i>Attrition bias</i>                                                                                                         |                                                                                                                                                                              |                           |
| <b>Incomplete outcome data</b> <i>Assessments should be made for each main outcome (or class of outcomes).</i>                | No loss is reported.                                                                                                                                                         | Unclear                   |
| <i>Reporting bias</i>                                                                                                         |                                                                                                                                                                              |                           |
| <b>Selective reporting</b>                                                                                                    | No reason to suspect.                                                                                                                                                        | Yes                       |
| <b>Other sources of bias</b>                                                                                                  | No big differences between baseline values for outcome measure or baseline characteristics                                                                                   | Yes                       |
| <b>Overall judgment</b>                                                                                                       | <b>High risk of bias</b>                                                                                                                                                     |                           |

*GRADE summary of findings tables for interventions to structure and standardise care*

**Table S4**    **GRADE summary of findings table – Advance care directives**

TABLE S4: EDUCATIONAL INTERVENTION ALONE OR IN COMBINATION WITH OTHER INTERVENTIONS TO ENHANCE ADVANCE CARE PLANNING

**Population:** Nursing home residents  
**Setting:** Nursing homes, Canada, Australia, USA  
**Intervention:** Educational intervention alone or in combination with other interventions  
**Comparison:** Usual care

**Educating staff, residents and family in advance care planning compared to usual care**

| Outcome                                                    | Comparing risk in the two groups (95%CI)                                  |                                                                                                        | Relative effect (95% CI) | Number of participants (studies)  | Quality of documentation (GRADE) | Comment                                                                                                        |
|------------------------------------------------------------|---------------------------------------------------------------------------|--------------------------------------------------------------------------------------------------------|--------------------------|-----------------------------------|----------------------------------|----------------------------------------------------------------------------------------------------------------|
|                                                            | Assumed risk                                                              | Compared risk                                                                                          |                          |                                   |                                  |                                                                                                                |
|                                                            | Usual care                                                                | Educational intervention alone in Advance Care Planning                                                |                          |                                   |                                  |                                                                                                                |
| <b>Hospitalisation per resident</b><br>Follow-up 18 months | Mean number of hospital admissions per resident in control group was 0,48 | Mean number of hospital admissions per resident in intervention group was 0,21 lower (CI not reported) |                          | 6 clusters/1133 participants (1)  | ⊕⊕⊕⊖<br>Low <sup>1,2</sup>       | 'Intervention nursing homes reported fewer hospitalisations per resident (mean 0.27 vs 0.48 = -0.21, p=0.001)' |
| <b>Mortality</b><br>Follow-up 18 months                    | <b>276 per 1000</b>                                                       | <b>237 per 1000</b>                                                                                    | RR 0,86 (0.70–1.04 )     | 6 clusters/1133 participants (1 ) | ⊕⊕⊕⊖<br>Low <sup>1,2</sup>       | Not-significant finding (24% vs 28%, p=0.20)                                                                   |

**Educating staff, residents and health personnel in advance care planning combined with hospital-in-the-nursing-home compared to usual care**

| Outcome                                         | Comparing risk in the two groups (95%CI) |                                                                                                  | Relative effect (95% CI) | Number of participants (studies)      | Quality of documentation (GRADE) | Comment                                                      |
|-------------------------------------------------|------------------------------------------|--------------------------------------------------------------------------------------------------|--------------------------|---------------------------------------|----------------------------------|--------------------------------------------------------------|
|                                                 | Assumed risk                             | Compared risk                                                                                    |                          |                                       |                                  |                                                              |
|                                                 | Usual care                               | Educating health personnel in Advance Care Planning combined with hospital-in-the-nursing- home. |                          |                                       |                                  |                                                              |
| <b>Hospital admission</b><br>Follow-up: 3 years | Not reported                             | Not reported                                                                                     | RR 0.89 (0.85-0.93)      | 32 nursing homes/514 participants (1) | ⊕⊖⊖⊖<br>Very low <sup>2,5</sup>  | Controlled before-after study                                |
| <b>Mortality</b><br>Follow-up 3 years           | See comment                              | See comment                                                                                      |                          | 32 nursing homes/514 participants (1) | ⊕⊖⊖⊖<br>Very low <sup>2,5</sup>  | 30.4 versus 41.6 deaths per 100 nursing home beds (p=0.0425) |

**Educating social workers in advance care planning combined with feedback to physician, compared to usual care**

| Outcome | Comparing risk in the two groups (95%CI) |               | Relative effect (95% CI) | Number of participants (studies) | Quality of documentation (GRADE) | Comment |
|---------|------------------------------------------|---------------|--------------------------|----------------------------------|----------------------------------|---------|
|         | Assumed risk                             | Compared risk |                          |                                  |                                  |         |

|                    | Usual care   | Educating social workers in ACP combined with feedback to physician |                         |                                                                             |
|--------------------|--------------|---------------------------------------------------------------------|-------------------------|-----------------------------------------------------------------------------|
| Hospital admission | 271 per 1000 | 163 per 1000<br>(76 to 347)                                         | RR 0.60<br>(0.28 -1.28) | 4 clusters/139 participants ⊕⊖⊖⊖<br>(1)<br><b>Very low</b> <sup>2,3,4</sup> |

**Table S5: GRADE Summary of findings table – Palliative care**

TABLE S5: INTERVENTION TO IMPROVE PALLIATIVE CARE IN NURSING HOMES

**Population:** Nursing home residents  
**Setting:** Nursing homes, USA  
**Intervention:** Increase the use of hospice services in nursing homes  
**Comparison:** Usual care

| Outcome                                      | Comparing risk in the two groups (95 % CI)                     |                                                                                             | Relative effect (95% CI) | Number of participants (studies) | Quality of documentation (GRADE)       | Comment                                                                                                                                                  |
|----------------------------------------------|----------------------------------------------------------------|---------------------------------------------------------------------------------------------|--------------------------|----------------------------------|----------------------------------------|----------------------------------------------------------------------------------------------------------------------------------------------------------|
|                                              | Assumed risk<br><b>Usual care</b>                              | Compared risk<br><b>Use of palliative care services</b>                                     |                          |                                  |                                        |                                                                                                                                                          |
| <b>Hospitalisation</b><br>Follow-up 6 months | Mean hospitalisation rate in the control group was <b>0.49</b> | Mean hospitalisation rate in the intervention group was <b>0.21 lower (CI not reported)</b> |                          | 205 (1)                          | ⊕⊖⊖⊖<br><b>Very low</b> <sup>1,2</sup> | 'Intervention residents also had fewer acute admissions (mean [SD]: 0.28 [0.70] vs 0.49 [0.89]; $p=0.04$ [Wilcoxon rank sum test])'                      |
| <b>Length of stay in hospital</b>            | Mean length of stay in the control group was <b>3.0 days</b>   | Mean length of stay in the intervention group was <b>1.8 days lower (CI not reported)</b>   |                          | 205 (1)                          | ⊕⊖⊖⊖<br><b>Very low</b> <sup>1,2</sup> | 'Intervention residents also [...] spent fewer days in an acute care setting (mean [SD]: 1.17 [3.32] vs 2.99 [6.07]; $p=0.03$ [Wilcoxon rank sum test])' |
| <b>Mortality</b><br>Follow-up: 6 months      | 82 per 1000                                                    | 140 per 1000 (62 to 316)                                                                    | RR 1.72 (0.76 to 3.87)   | 205 (1)                          | ⊕⊖⊖⊖<br><b>Very low</b> <sup>1,2</sup> | Absolute risk reduction -5.86 % (CI -14.38 - 2.67).                                                                                                      |

<sup>1</sup> No concealment of allocation, no blinding, incomplete reporting of data, possible contamination between intervention and control groups as the doctors treated residents in both groups.

<sup>2</sup> Only one study with few events.

**Table S6: GRADE Summary of findings table – Multifaceted implementation of national guideline for management of nursing home-acquired pneumonia**

TABELL S6: MULTIFACETED IMPLEMENTATION OF A NATIONAL GUIDELINE FOR MANAGEMENT OF NURSING HOME-ACQUIRED PNEUMONIA COMPARED TO USUAL CARE

**Patient:** Nursing home residents

**Setting:** Nursing homes, USA

**Intervention:** Educational intervention with support of change agents for implementing a national guideline in the care of nursing-home acquired pneumonia

**Comparison:** Usual care

| Outcome                     | Comparison of risk in the two groups (95 % CI)          |                                                                                                     | Relative effect (95% CI) | Number of participants (studies)        | Quality of documentation (GRADE)       | Comment                                                                                                                                                                                        |
|-----------------------------|---------------------------------------------------------|-----------------------------------------------------------------------------------------------------|--------------------------|-----------------------------------------|----------------------------------------|------------------------------------------------------------------------------------------------------------------------------------------------------------------------------------------------|
|                             | Assumed risk                                            | Compared risk                                                                                       |                          |                                         |                                        |                                                                                                                                                                                                |
|                             | Usual care                                              | Multifaceted intervention of a national guideline for management of nursing home-acquired pneumonia |                          |                                         |                                        |                                                                                                                                                                                                |
| <b>Hospitalization rate</b> | Mean hospitalisation rate in the control group was 23 % | Mean hospitalisation rate in intervention group was 13,6 % (see comment)                            |                          | 16 nursing homes/ 1123 participants (1) | ⊕⊖⊖⊖<br><b>Very low</b> <sup>1,2</sup> | Controlled before-after study                                                                                                                                                                  |
| Follow-up: 3 years          |                                                         |                                                                                                     |                          |                                         |                                        | Risk difference by the end of study-period, adjusted for differences at baseline = -2.9 (2.9 % fewer residents hospitalized in the intervention group, but this is a non-significant finding). |

<sup>1</sup> No randomisation procedure, resulting in differences at baseline between intervention and control groups. No concealment of allocation. Unclear outcome reporting.

<sup>2</sup> Not possible to read how the authors have calculated the hospitalisation rates. It is unclear whether there is loss to follow-up for this outcome.

**Table S7: GRADE Summary of findings table – On-site treatment of pneumonia according to care pathway**

TABELL S7: Effect of a standardised care pathway for on-site treatment of pneumonia compared to usual care.

**Population:** Nursing home residents  
**Setting:** Nursing homes, Canada  
**Intervention:** Standardised care pathway for nursing home residents with lower respiratory infection  
**Comparison:** Usual care

| Outcome                                                                        | Comparing risk in the two groups (95 % CI)                                      |                                                                                                                   | Relative effect (95% CI) | Number of participants (studies)      | Quality of documentation (GRADE) | Comment                                                                                                                                                                                                                                                    |
|--------------------------------------------------------------------------------|---------------------------------------------------------------------------------|-------------------------------------------------------------------------------------------------------------------|--------------------------|---------------------------------------|----------------------------------|------------------------------------------------------------------------------------------------------------------------------------------------------------------------------------------------------------------------------------------------------------|
|                                                                                | Usual care                                                                      | Care pathway for residents with lower respiratory infection                                                       |                          |                                       |                                  |                                                                                                                                                                                                                                                            |
| <b>Hospitalisation, proportion of groups</b><br>Follow-up: Up to 30 days       | Proportion hospitalised in control groups was <b>20 %</b>                       | Proportion hospitalised in intervention groups was <b>12 % lower</b> (5 to 18 lower)                              |                          | 22 nursing homes/ 661participants (1) | ⊕⊕⊕⊖<br><b>Low</b> <sup>1</sup>  | 'Adjusting for the clustering of residents in nursing homes, the weighted mean admission rate was 8% in the clinical pathway group vs 20% in the usual care group, with a weighted mean difference of 12% (95% confidence interval [CI], 5%-18%; =0.001)'. |
| <b>Length of stay in hospital (number of days)</b><br>Follow-up: Up to 30 days | Mean length of stay in hospital in control groups was 1.74 days                 | Mean length of stay in hospital in intervention groups was <b>0.95 days lower</b> (0.34 to 1.55 lower)            |                          | 22 nursing homes/ 661participants (1) | ⊕⊕⊕⊖<br><b>Low</b> <sup>1</sup>  | 'The mean number of hospital days per resident was 0.79 in the clinical pathway group vs 1.74 in the usual care group, with a weighted mean difference of 0.95 days per resident (95% CI, 0.34-1.55 days; p=0.004)'                                        |
| <b>Mortality, percentage</b><br>Follow-up: Up to 30 days.                      | Mean mortality in control group was 6 %                                         | Mean mortality in intervention group was <b>2.9 % lower</b> (7.9 lower to 2.0 higher)                             |                          | 22 nursing homes/ 661participants (1) | ⊕⊕⊕⊖<br><b>Low</b> <sup>1</sup>  | Death, %, 3.1 (-0.2 to 6.4) in intervention group vs 6.0 (1.8 to 10.3) in control group (difference of 2.9% (95% CI: -2.0-7.9, p-value = 0.23)).                                                                                                           |
| <b>Time to normal vital signs</b><br>Follow-up: Up to 30 days                  | Mean number of days to normal vital signs in control group was <b>2.66 days</b> | Mean number of days to normal vital signs in intervention group was <b>0.12 lower</b> (1.02 lower to 0.78 higher) |                          | 22 nursing homes/ 661participants (1) | ⊕⊕⊕⊖<br><b>Low</b> <sup>1</sup>  | '2.55 (95% CI:1.60 to 3.48) days in pathway group vs 2.66 (95% CI: 2.24 to 3.08) in control group (difference of 0.12 days (95% CI: -0.78 to 1.02, p-value = 0.79)'                                                                                        |

<sup>1</sup> Only one study with few events.

**Table S8: GRADE Summary of findings table – Care protocol for hospitalized residents with COPD**

TABLE S8: CARE PROTOCOL COMPARED TO USUAL CARE FOR NURSING HOME RESIDENTS WITH COPD

**Population:** Nursing home residents with COPD

**Setting:** Nursing homes, Hong Kong

**Intervention:** Care protocol

**Comparison:** Usual care

| Outcome                                                           | Comparison of risk in the two groups (95% CI)                           |                                                                                                                 | Relative effect (95% CI) | Number of participants (studies)     | Quality of documentation (GRADE)         | Comment                                                                                                                       |
|-------------------------------------------------------------------|-------------------------------------------------------------------------|-----------------------------------------------------------------------------------------------------------------|--------------------------|--------------------------------------|------------------------------------------|-------------------------------------------------------------------------------------------------------------------------------|
|                                                                   | Assumed risk                                                            | Compared risk                                                                                                   |                          |                                      |                                          |                                                                                                                               |
|                                                                   | Usual care                                                              | Care protocol                                                                                                   |                          |                                      |                                          |                                                                                                                               |
| <b>Re-hospitalisations related to COPD</b><br>Follow-up: 6 months | Mean number of re-hospitalisations in the control group was <b>1.39</b> | Mean number of re-hospitalisations in the intervention group was <b>0.15 higher</b> (0.53 lower to 0.83 higher) |                          | 45 nursing homes/89 participants (1) | ⊕⊖⊖⊖<br><b>Very low</b> <sup>1,2,3</sup> | Total number of COPD-related readmissions: Mean 1.54 (SD± 1.75) in intervention group, 1.39 (SD± 1.51) in control group.      |
| <b>Length of stay in hospital</b><br>Follow-up: 6 months          | Mean length of stay in control group was <b>14.98 days</b>              | Mean length of stay for intervention group was <b>0.63 lower</b> (8.87 lower to 7.61 higher)                    |                          | 45 nursing homes/89 participants (1) | ⊕⊖⊖⊖<br><b>Very low</b> <sup>1,2,3</sup> | Total number of COPD-related hospital days: Mean 14.35 (SD± 19.27) in intervention group; 14.98 (SD± 20.18) in control group. |

<sup>1</sup> Method of sequence generation is not reported. 20 % attrition post-randomisation is not fully accounted for. Blinding of health personnel recruiting participants is not reported. Statistical analyses not adjusted for cluster-effect or matching.

<sup>2</sup> Uncertain about directedness for population and intervention.

<sup>3</sup> Only one study and very few events.



**GRADE summary of findings tables for geriatric specialist services**

**Table S9: GRADE Summary of findings table - Geriatric specialist team compared to usual care**

| <b>TABLE S9: Geriatric specialist team compared to usual care</b> |                                                      |                                                |                                  |                                         |                                         |                                |
|-------------------------------------------------------------------|------------------------------------------------------|------------------------------------------------|----------------------------------|-----------------------------------------|-----------------------------------------|--------------------------------|
| <b>Population:</b> Nursing home residents                         |                                                      |                                                |                                  |                                         |                                         |                                |
| <b>Setting:</b> Nursing homes, Spain                              |                                                      |                                                |                                  |                                         |                                         |                                |
| <b>Intervention:</b> Geriatric specialist team                    |                                                      |                                                |                                  |                                         |                                         |                                |
| <b>Comparison:</b> Usual care                                     |                                                      |                                                |                                  |                                         |                                         |                                |
| <b>Outcome</b>                                                    | <b>Comparison of risk in the two groups (95% CI)</b> |                                                | <b>Relative effect (95% CI)</b>  | <b>Number of participants (studies)</b> | <b>Quality of documentation (GRADE)</b> | <b>Comment</b>                 |
|                                                                   | <b>Assumed risk Usual care</b>                       | <b>Compared risk Geriatric specialist team</b> |                                  |                                         |                                         |                                |
| <b>Hospitalisation</b><br>Follow-up: 3 years                      | <b>558 per 1000</b>                                  | <b>324 per 1000</b><br>(290 to 363)            | <b>RR 0,58</b><br>(0.52 to 0.65) | 2057 beds<br>(1)                        | ⊕⊖⊖⊖<br><b>Very low</b> <sup>1</sup>    | Controlled before-after design |

<sup>1</sup> No sequence generation or concealed allocation. Attrition not accounted for. No baseline characteristics of the two groups. No adjustment for prognostic or possibly confounding factors.

**Table S10: GRADE Summary of findings table – Ambulant geriatric services compared to usual care**

| <b>TABLE S10: AMBULANT GERIATRIC SERVICE COMPARED TO USUAL CARE IN NURSING HOMES</b> |                                                                                                                            |                                                                                                           |                           |                                  |                                      |                                                                                                                                                                                                                   |
|--------------------------------------------------------------------------------------|----------------------------------------------------------------------------------------------------------------------------|-----------------------------------------------------------------------------------------------------------|---------------------------|----------------------------------|--------------------------------------|-------------------------------------------------------------------------------------------------------------------------------------------------------------------------------------------------------------------|
| <b>Patient:</b> Nursing home residents                                               |                                                                                                                            |                                                                                                           |                           |                                  |                                      |                                                                                                                                                                                                                   |
| <b>Setting:</b> Nursing homes, Austria                                               |                                                                                                                            |                                                                                                           |                           |                                  |                                      |                                                                                                                                                                                                                   |
| <b>Intervention:</b> Ambulant geriatric service                                      |                                                                                                                            |                                                                                                           |                           |                                  |                                      |                                                                                                                                                                                                                   |
| <b>Comparison:</b> Usual care                                                        |                                                                                                                            |                                                                                                           |                           |                                  |                                      |                                                                                                                                                                                                                   |
| Outcome                                                                              | Comparing risk in the two groups (95 % CI)                                                                                 |                                                                                                           | Relative effect (95 % CI) | Number of participants (studies) | Quality of documentation (GRADE)     | Comment                                                                                                                                                                                                           |
|                                                                                      | Assumed risk                                                                                                               | Compared risk                                                                                             |                           |                                  |                                      |                                                                                                                                                                                                                   |
|                                                                                      | Usual care                                                                                                                 | Mobile geriatric team                                                                                     |                           |                                  |                                      |                                                                                                                                                                                                                   |
| <b>Hospitalisation</b>                                                               | Mean number of hospital admissions in the control group was<br><b>11.7 hospital admissions per 100 residents per month</b> | Mean number of hospital admissions in the intervention group was<br><b>5.6 lower</b><br>(CI not reported) |                           | 261<br>(1)                       | ⊕⊖⊖⊖<br><b>Very low</b> <sup>1</sup> | Controlled before-after study. In the intervention homes, the frequency of hospital admissions was 6,1 admissions per month per 100 residents, in the control group the number was 11,7 ( <i>p</i> -value < 0.01) |
| Follow-up: 10 months.                                                                |                                                                                                                            |                                                                                                           |                           |                                  |                                      |                                                                                                                                                                                                                   |

<sup>1</sup> No random sequence generation or allocation of concealment. Only one intervention home and one control home. It is not reported how these homes were selected. No loss to follow-up is reported. The two nursing homes differ greatly in size.

## GRADE summary of findings tables for Influenza Vaccination

**Table S11: GRADED Summary of findings table – Influenza vaccination of nursing home residents**

| TABLE S11: INFLUENZA VACCINATION FOR NURSING HOME RESIDENTS COMPARED TO USUAL CARE                |                                                |                                                                  |                                  |                                  |                                          |         |
|---------------------------------------------------------------------------------------------------|------------------------------------------------|------------------------------------------------------------------|----------------------------------|----------------------------------|------------------------------------------|---------|
| Population: Nursing home residents                                                                |                                                |                                                                  |                                  |                                  |                                          |         |
| Setting: Nursing homes, USA, Australia, Canada, Japan, Italy, China, Great Britain                |                                                |                                                                  |                                  |                                  |                                          |         |
| Intervention: Influenza vaccination of nursing home residents                                     |                                                |                                                                  |                                  |                                  |                                          |         |
| Comparison: Usual care                                                                            |                                                |                                                                  |                                  |                                  |                                          |         |
| Outcome                                                                                           | Comparison of risk in the two groups (95 % CI) |                                                                  | Relative effect (95 % CI)        | Number of participants (studies) | Quality of documentation (GRADE)         | Comment |
|                                                                                                   | Assumed risk<br>Usual care                     | Compared risk<br>Influenza vaccination of nursing home residents |                                  |                                  |                                          |         |
| <b>Influenza like illness</b><br>Follow-up: From 1 week to an influenza season                    | <b>264 per 1000</b>                            | <b>200 per 1000</b><br>(174 to 232)                              | <b>RR 0.76</b><br>(0.66 to 0.88) | 12388<br>(26 studies)            | ⊕⊕⊕⊕<br><b>Very low</b> <sup>1,2,3</sup> |         |
| <b>Influenza, laboratory-confirmed</b><br>Follow-up: from 6 weeks to 7 months                     | <b>63 per 1000</b>                             | <b>41 per 1000</b><br>(20 to 82)                                 | <b>RR 0.65</b><br>(0.32 to 1.29) | 1941<br>(8 studies)              | ⊕⊕⊕⊕<br><b>Very low</b> <sup>1,3</sup>   |         |
| <b>Pneumonia</b><br>Follow-up: from 3 weeks to 6 months                                           | <b>7 per 1000</b>                              | <b>4 per 1000</b><br>(3 to 5)                                    | <b>RR 0.53</b><br>(0.43 to 0.66) | 10274<br>(17 studies)            | ⊕⊕⊕⊕<br><b>Very low</b> <sup>1</sup>     |         |
| <b>Hospitalisation for influenza-like illness or pneumonia</b> Follow-up: from 1 week to 5 months | <b>17 per 1000</b>                             | <b>9 per 1000</b><br>(5 to 14)                                   | <b>RR 0.51</b><br>(0.32 to 0.81) | 28032<br>(12 studies)            | ⊕⊕⊕⊕<br><b>Very low</b> <sup>1</sup>     |         |
| <b>Death caused by influenza or pneumonia</b><br>Follow-up: 1-6 months                            | <b>11 per 1000</b>                             | <b>5 per 1000</b><br>(4 to 7)                                    | <b>RR 0.46</b><br>(0.33 to 0.63) | 32179<br>(27 studies)            | ⊕⊕⊕⊕<br><b>Very low</b> <sup>1</sup>     |         |
| <b>Overall mortality</b><br>Follow-up: 6 months                                                   | <b>177 per 1000</b>                            | <b>71 per 1000</b><br>(37 to 136)                                | <b>RR 0.40</b> (0.21 to 0.77)    | 305<br>(1 study)                 | ⊕⊕⊕⊕<br><b>Very low</b> <sup>1,4</sup>   |         |

<sup>1</sup> Possible selection bias

<sup>2</sup> Inconsistency of results across studies, heterogeneity  $I^2=57-60\%$

<sup>3</sup> Wide confidence intervals

<sup>4</sup> Only one study with few events

**Table S12: GRADE Summary of findings table – Influenza vaccination of health personnel**

| <b>TABLE S12: PROMOTING INFLUENZA VACCINATION AMONG HEALTH PERSONNEL IN NURSING HOMES COMPARED TO USUAL CARE</b> |                                               |                                                         |                                  |                                  |                                        |                              |
|------------------------------------------------------------------------------------------------------------------|-----------------------------------------------|---------------------------------------------------------|----------------------------------|----------------------------------|----------------------------------------|------------------------------|
| <b>Population:</b> Nursing home residents                                                                        |                                               |                                                         |                                  |                                  |                                        |                              |
| <b>Setting:</b> Nursing homes in France and England                                                              |                                               |                                                         |                                  |                                  |                                        |                              |
| <b>Intervention:</b> Influenza vaccination of health personnel                                                   |                                               |                                                         |                                  |                                  |                                        |                              |
| <b>Comparison:</b> Usual care                                                                                    |                                               |                                                         |                                  |                                  |                                        |                              |
| Outcome                                                                                                          | Comparison of risk in the two groups (95% CI) |                                                         | Relative effect (95% CI)         | Number of participants (studies) | Quality of documentation (GRADE)       | Comment                      |
|                                                                                                                  | Assumed risk<br>Usual care                    | Compared risk<br>Influenza vaccinating health personnel |                                  |                                  |                                        |                              |
| <b>Influenza-like illness</b><br>Follow-up: 118 and 145 days                                                     | <b>122 per 1000</b>                           | <b>88 per 1000</b><br>(76 to 102)                       | <b>RR 0.72</b><br>(0.62 to 0.84) | 5972<br>(2)                      | ⊕⊕⊖⊖<br><b>Low</b> <sup>1,2</sup>      |                              |
| <b>Hospitalization</b><br>Follow-up: 118 and 145 days                                                            | <b>96 per 1000</b>                            | <b>85 per 1000</b><br>(72 to 101)                       | <b>RR 0.89</b><br>(0.75 to 1.06) | 5972<br>(2)                      | ⊕⊕⊖⊖<br><b>Low</b> <sup>1,2</sup>      |                              |
| <b>Death caused by pneumonia</b><br>Follow-up: 118 days                                                          | <b>7 per 1000</b>                             | <b>11 per 1000</b><br>(5 to 23)                         | <b>RR 1.54</b><br>(0.75 to 3.17) | 3400<br>(1)                      | ⊕⊖⊖⊖<br><b>Very low</b> <sup>1,2</sup> |                              |
| <b>Death caused by influenza-like illness</b><br>Follow-up: 145 days                                             | <b>14 per 1000</b>                            | <b>10 per 1000</b><br>(5 to 21)                         | <b>RR 0.72</b><br>(0.35 to 1.47) | 2572<br>(1)                      | ⊕⊖⊖⊖<br><b>Very low</b> <sup>1,2</sup> |                              |
| <b>Overall mortality</b>                                                                                         | <b>101 per 1000</b>                           | <b>74 per 1000</b><br>(61 to 90)                        | <b>RR 0.73</b><br>(0.60 to 0.89) | 5972<br>(2)                      | ⊕⊕⊖⊖<br><b>Low</b> <sup>1,2</sup>      |                              |
| <b>Influenza, laboratory-confirmed</b>                                                                           |                                               |                                                         |                                  |                                  |                                        | This outcome is not reported |

<sup>1</sup> Unclear risk of bias (one of the studies not blinded, the other unclear. One study non-satisfactory treatment of missing data).

<sup>2</sup> Wide confidence intervals.
